# Supplementary material for: Pyruvate Dehydrogenase A1 Phosphorylated by Insulin Associates with Pyruvate Kinase M2 and Induces LINC00273 through Histone Acetylation
Source: MDPI journal article supplement (doi:10.3390/biomedicines10061256), 2022-05-27
Supplement: s1 [file s1]

A

**Mouse Pyruvate kinase M2 (PKM2) (NM\_011099.3)**

|     |            |            |            |            |            |
|-----|------------|------------|------------|------------|------------|
| 1   | MPKPDSEAGT | AFIQTQQLHA | AMADTFLEHM | CRLDIDSAPI | TARNTGIICT |
| 51  | IGPASRSVEM | LKEMIKSGMN | VARLNFSHGT | HEYHAETIKN | VRAATESFAS |
| 101 | DPILYRPVAV | ALDTKGPEIR | TGLIKGSGTA | EVELKKGATL | KITLDNAYME |
| 151 | KCDENILWLD | YKNICKVVEV | GSKIYVDDGL | ISLQVKEKGA | DYLVTEVENG |
| 201 | GSLGSKKGVN | LPGAAVDLPA | VSEKDIQDLK | FGVEQDVDMV | FASFIRKAAD |
| 251 | VHEVRKVLGE | KGKNIKIISK | IENHEGVRRF | DEILEASDGI | MVARGDLGIE |
| 301 | IPAEKVFLAQ | KMMIGRCNRA | GKPVICATQM | LESMIKKPRP | TRAEGSDVAN |
| 351 | AVLDGADCIM | LSGETAKGDY | PLEAVRMQHL | IAREAEAAIY | HLQLFEELRR |
| 401 | LAPITSDPTE | AAAVGAVEAS | FKCCSGAIIV | LTKSGRSAHQ | VARYRPRAPI |
| 451 | IAVTRNPQTA | RQAHLYRGIF | PVLCKDAVLD | AWAEDVDLRV | NLAVNVGKTR |
| 501 | GFFKKGDVVI | VLTGWRPGSG | FTNTMRVVPV | P          |            |

B

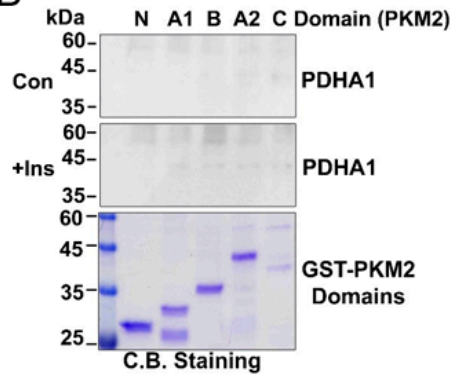

**Figure S1. Identified peptides of PKM2 by MALDI-TOF analysis.** (A) Amino acid sequence of mouse PKM2 is shown and the peptide fragments of PKM2 (NM\_011099.3) that were identified with MADLI-TOF (red color). The peptide fragment underlined indicates the difference from that of PKM1. Peptides in red indicate the ones identified by MALDI-TOF analysis (eBiogene). (B) Insulin (100 nm for 48 h) or without insulin HepG2 cells lysate were incubated with each recombinant GST-PKM2 domains (2  $\mu$ g protein) and PDHA1 level by western blotting (upper panel). GST-PKM2 domains were visualized by Coomassie-blue staining (lower panel).

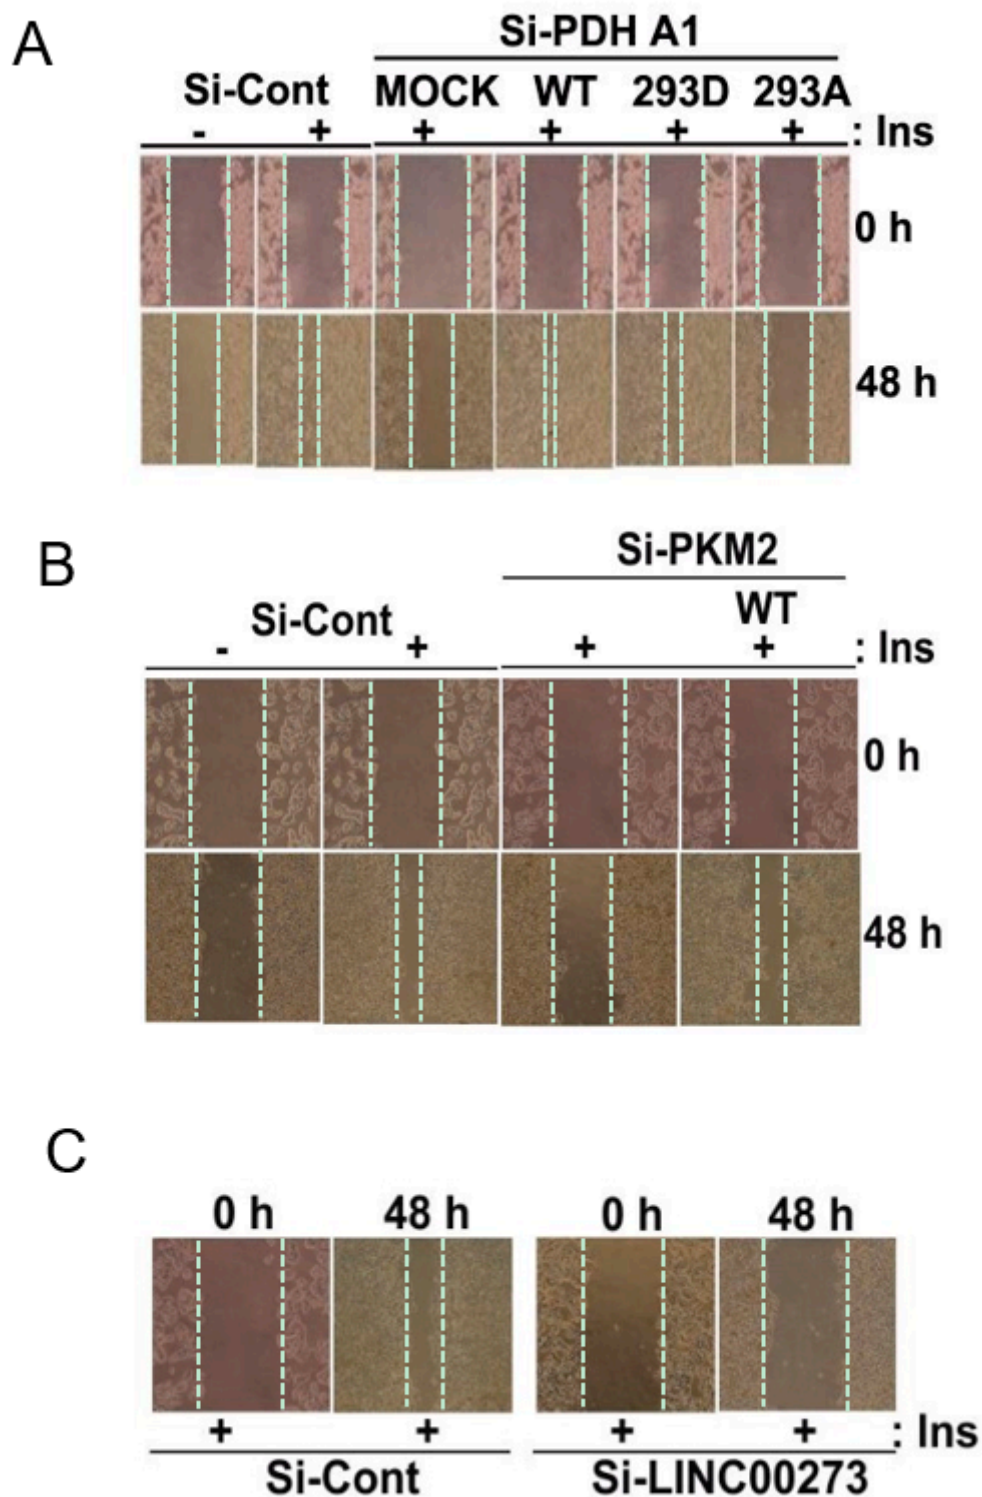

**Figure S2. Cell migration by wound healing assay.** (A) si-PDHA1 transfection and addback with PDHA1 WT, S293D and S293A to the HepG2 cells which were stimulated with insulin (100 nM for 48 h) and cell migration was measured by the wound healing assay (B) HepG2 cells were transfected with si-PKM2 and in presence of PKM2 WT addback, cell migration upon insulin (100 nM for 48 h) was measured by wound healing assay. (C) HepG2 cells were transfected with si-LINC00273 and cell migration was determined by the wound healing assay followed by insulin (100 nM for 48 h).

## A Liver Cancer

| Number | Band Intensity of p-PDH | Band Intensity of PKM2 | Age | Date Of Diagnosis | Date Of Treatment | Date Of Death | Treatment Consistency | Gender |
|--------|-------------------------|------------------------|-----|-------------------|-------------------|---------------|-----------------------|--------|
| 1      | 9.98                    | 44.1                   | 75  | 2012-12-11        | 2014-01-27        | 2014-11-25    | Dead                  | Male   |
| 2      | 10.45                   | 4.9                    | 72  | 2011-12-30        | 2017-03-23        | 2017-05-19    | Dead                  | Male   |
| 3      | 2.08                    | 17.15                  | 59  | 2013-08-05        | 2014-07-16        |               | Cured                 | Male   |
| 4      | 3.71                    | 26.13                  | 61  | 2011-04-29        | 2018-09-09        | 2018-09-09    | Dead                  | Male   |
| 5      | 4.17                    | 26.95                  | 55  | 2013-07-18        | 2016-07-05        | 2016-07-05    | Dead                  | Female |
| 6      | 3.24                    | 23.68                  | 47  | 2014-07-22        | 2016-03-12        | 2016-03-12    | Dead                  | Female |
| 7      | 19.03                   | 9.8                    | 68  | 2016-11-10        | 2020-08-19        |               | Continue              | Male   |
| 8      | 19.49                   | 22.05                  | 63  | 2017-02-09        | 2017-10-02        | 2017-10-02    | Dead                  | Male   |
| 9      | 20.66                   | 8.16                   | 61  | 2017-02-10        | 2020-07-21        |               | Continue              | Male   |
| 10     | 23.67                   | 7.35                   | 49  | 2017-03-14        | 2020-08-06        |               | Continue              | Male   |
| 11     | 9.74                    | 15.51                  | 62  | 2017-04-25        | 2017-09-15        | 2018-05-28    | Dead                  | Male   |
| 12     | 16.71                   | 6.53                   | 66  | 2017-05-15        | 2020-06-01        |               | Continue              | Male   |
| 13     | 1.62                    | 27.76                  | 64  | 2015-09-07        | 2020-07-06        |               | Continue              | Male   |
| 13     | 1.72                    | 22.5                   | 64  | 2015-09-07        | 2020-07-06        |               | Continue              | Male   |
| 14     | 8.74                    | 10.5                   | 72  | 2016-07-07        | 2020-05-12        |               | Continue              | Male   |
| 15     | 12.62                   | 8                      | 62  | 2018-09-10        | 2020-08-11        |               | Continue              | Male   |
| 16     | 6.99                    | 12.5                   | 55  | 2018-10-15        | 2020-06-08        |               | Continue              | Male   |
| 17     | 2.62                    | 6                      | 56  | 2018-11-22        | 2020-08-21        |               | Continue              | Male   |
| 18     | 5.99                    | 6.5                    | 71  | 2018-12-28        | 2020-08-10        |               | Continue              | Male   |
| 19     | 6.37                    | 24.5                   | 64  | 2019-01-04        | 2020-08-04        |               | Continue              | Female |
| 20     | 9.49                    | 7.5                    | 56  | 2014-09-30        | 2019-04-18        |               | Cured                 | Male   |
| 21     | 11.5                    | 5                      | 76  | 2019-03-08        | 2020-07-13        |               | Continue              | Female |
| 22     | 9.49                    | 16.5                   | 74  | 2019-03-07        | 2019-09-19        |               | Cured                 | Male   |
| 23     | 5.62                    | 13.5                   | 74  | 2019-03-11        | 2020-08-05        |               | Continue              | Male   |
| 24     | 2.75                    | 4                      | 56  | 2019-03-05        | 2020-08-07        |               | Continue              | Male   |
| 25     | 1                       | 1                      | 46  | 2019-07-16        | 2020-03-23        |               | Continue              | Male   |

## B Lung Cancer

| Number | Band Intensity of p-PDH | Age | Cancer Stage | Date Of Diagnosis | Date Of Treatment | Date Of Death | Treatment Consistency | Gender |
|--------|-------------------------|-----|--------------|-------------------|-------------------|---------------|-----------------------|--------|
| 1      | 12.5                    | 74  | Unknown      | 2012-05-10        | 2015-04-28        | 2016-01-07    | Dead                  | Male   |
| 2      | 1.4                     | 21  | I            | 2014-03-06        | 2018-05-03        |               | Cured                 | Female |
| 3      | 12.7                    | 73  | II           | 2014-06-16        | 2015-04-16        | 2015-04-25    | Dead                  | Male   |
| 4      | 0                       | 75  | II           | 2014-07-21        | 2020-08-19        |               | Continue              | Female |
| 5      | 4.2                     | 33  | III          | 2015-08-06        | 2020-08-03        |               | Continue              | Male   |
| 6      | 0                       | 69  | III          | 2015-09-30        | 2020-06-26        |               | Continue              | Male   |
| 7      | 12.3                    | 56  | III          | 2016-02-26        | 2016-06-29        | 2016-06-29    | Dead                  | Male   |
| 8      | 1.8                     | 57  | II           | 2016-03-24        | 2020-08-25        |               | Continue              | Male   |
| 9      | 1.8                     | 46  | I            | 2016-03-10        | 2020-08-20        |               | Continue              | Female |
| 10     | 3.8                     | 77  | I            | 2016-04-27        | 2019-08-12        |               | Cured                 | Female |
| 11     | 1                       | 60  | III          | 2016-05-20        | 2017-04-17        | 2017-04-17    | Dead                  | Male   |
| 12     | 3.2                     | 62  | II           | 2016-11-13        | 2020-04-07        |               | Continue              | Male   |
| 13     | 5.1                     | 70  | I            | 2016-11-15        | 2017-02-20        | 2017-02-20    | Dead                  | Male   |
| 13     | 4                       | 70  | I            | 2016-11-15        | 2017-02-20        | 2017-02-20    | Dead                  | Male   |
| 14     | 2.1                     | 60  | I            | 2016-11-09        | 2019-10-29        |               | Cured                 | Male   |
| 15     | 11.3                    | 63  | II           | 2016-11-15        | 2018-05-10        | 2018-05-10    | Dead                  | Female |
| 16     | 0                       | 66  | III          | 2016-11-18        | 2020-06-29        |               | Continue              | Female |
| 17     | 0                       | 56  | II           | 2016-12-15        | 2020-04-24        |               | Continue              | Female |
| 18     | 2.4                     | 58  | I            | 2016-09-29        | 2020-06-29        |               | Continue              | Female |
| 19     | 0                       | 57  | I            | 2017-01-11        | 2020-06-18        |               | Continue              | Female |
| 20     | 3.1                     | 78  | I            | 2016-08-11        | 2020-05-26        |               | Continue              | Male   |
| 21     | 1                       | 64  | I            | 2016-12-30        | 2020-07-09        |               | Continue              | Female |
| 22     | 2.9                     | 78  | III          | 2016-11-26        | 2019-07-17        |               | Continue              | Female |
| 23     | 3.9                     | 55  | I            | 2017-01-16        | 2018-05-11        |               | Cured                 | Female |
| 24     | 2.7                     | 76  | II           | 2017-02-15        | 2020-08-12        |               | Continue              | Male   |
| 25     | 2.5                     | 67  | I            | 2017-01-31        | 2020-08-17        |               | Continue              | Male   |

**Figure S3. liver and lung cancer patient's information.** (A,B). Total Information on death and survival of the patients were obtained from the Korean Statistical Information Service KOSTAT database (KOSIS) of the Korean government and approved by the institutional review board (IRB: HIRB-2019-048) of Hallym University (Chuncheon, Korea).
